# Supplementary material for: HEALTHCARE RESOURCE UTILIZATION AND COSTS AMONG PATIENTS WITH POST-STROKE SPASTICITY BEFORE AND AFTER SPASTICITY MANAGEMENT INCLUDING ONABOTULINUMTOXINA
Source: PubMed Central journal article supplement — J Rehabil Med. 2023 Oct 30;55:11626. doi: 10.2340/jrm.v55.11626 (PMC10715292; doi:10.2340/jrm.v55.11626), 2023-10-30
Supplement: JRM-55-11626-s001.pdf [file JRM-55-11626-s001.pdf]

**Table SI. Inclusion Criteria—Diagnosis Codes**

|                                               | <b>Inclusion criteria—diagnosis codes</b>                                                                 |
|-----------------------------------------------|-----------------------------------------------------------------------------------------------------------|
| <b>Stroke-related spasticity – upper limb</b> | <b>ICD-10-CM Codes (2015-present) used alone:</b>                                                         |
|                                               | I69.03 (all) Monoplegia of upper limb following nontraumatic subarachnoid hemorrhage                      |
|                                               | I69.05 (all) Hemiplegia and hemiparesis following nontraumatic subarachnoid hemorrhage                    |
|                                               | I69.06 (all) Other paralytic syndrome following nontraumatic subarachnoid hemorrhage                      |
|                                               | I69.13 (all) Monoplegia of upper limb following nontraumatic intracerebral hemorrhage                     |
|                                               | I69.15 (all) Hemiplegia and hemiparesis following nontraumatic intracerebral hemorrhage                   |
|                                               | I69.16 (all) Other paralytic syndrome following nontraumatic intracerebral hemorrhage                     |
|                                               | I69.23 (all) Monoplegia of upper limb following other nontraumatic intracranial hemorrhage                |
|                                               | I69.25 (all) Hemiplegia and hemiparesis following other nontraumatic intracranial hemorrhage              |
|                                               | I69.26 (all) Other paralytic syndrome following other nontraumatic intracranial hemorrhage                |
|                                               | I69.33 (all) Monoplegia of upper limb following cerebral infarction                                       |
|                                               | I69.35 (all) Hemiplegia and hemiparesis following cerebral infarction                                     |
|                                               | I69.36 (all) Other paralytic syndrome following cerebral infarction                                       |
|                                               | I69.831 – I69.834, I69.839 Monoplegia of upper limb following other cerebrovascular disease               |
|                                               | I69.851 – I69.854, I69.859 Hemiplegia and hemiparesis following other cerebrovascular disease             |
|                                               | I69.861 – I69.865, I69.869 Other paralytic syndrome following other cerebrovascular disease               |
|                                               | I69.931 – I69.934, I69.939 Monoplegia of upper limb following unspecified cerebrovascular disease         |
|                                               | I69.951 – I69.954, I69.959 Hemiplegia and hemiparesis following unspecified cerebrovascular disease       |
|                                               | I69.961 – I69.965, I69.969 Other paralytic syndrome following unspecified cerebrovascular disease         |
|                                               | <b>ICD-9-CM Codes (2010-2014) used alone:</b>                                                             |
|                                               | 342.10 Spastic hemiplegia, affecting unspecified side                                                     |
|                                               | 342.11 Spastic hemiplegia, affecting dominant side                                                        |
|                                               | 342.12 Spastic hemiplegia, affecting nondominant side                                                     |
|                                               | 344.00 Other paralytic syndromes; quadriplegia, unspecified                                               |
|                                               | 344.01 Other paralytic syndromes; quadriplegia and quadriparesis; C1-C4, complete                         |
|                                               | 344.02 Other paralytic syndromes; quadriplegia and quadriparesis; C1-C4, incomplete                       |
|                                               | 344.03 Other paralytic syndromes; quadriplegia and quadriparesis; C5-C7, complete                         |
|                                               | 344.04 Other paralytic syndromes; quadriplegia and quadriparesis; C5-C7, incomplete                       |
|                                               | 344.09 Other paralytic syndromes; quadriplegia and quadriparesis; other                                   |
|                                               | 344.2 Other paralytic syndromes; diplegia of upper limbs                                                  |
|                                               | 344.40 Other paralytic syndromes; monoplegia of upper limb affecting unspecified side                     |
|                                               | 344.41 Other paralytic syndromes; monoplegia of upper limb affecting dominant side                        |
|                                               | 344.42 Other paralytic syndromes; monoplegia of upper limb affecting nondominant side                     |
|                                               | 344.5 Other paralytic syndromes; unspecified monoplegia                                                   |
|                                               | 344.89 Other paralytic syndromes; other specified paralytic syndromes; other specified paralytic syndrome |
|                                               | 344.9 Other paralytic syndromes; paralysis unspecified                                                    |
|                                               | 438.20 Late effects of cerebrovascular disease; hemiplegia affecting unspecified side                     |
|                                               | 438.21 Late effects of cerebrovascular disease; hemiplegia affecting dominant side                        |
|                                               | 438.22 Late effects of cerebrovascular disease; hemiplegia affecting nondominant side                     |
|                                               | 438.30 Late effects of cerebrovascular disease; monoplegia of upper limb affecting unspecified side       |

|                                                                                                   |                                                                                                                                                                                                                                                                                                                    |
|---------------------------------------------------------------------------------------------------|--------------------------------------------------------------------------------------------------------------------------------------------------------------------------------------------------------------------------------------------------------------------------------------------------------------------|
|                                                                                                   | 438.31 Late effects of cerebrovascular disease; monoplegia of upper limb affecting dominant side                                                                                                                                                                                                                   |
|                                                                                                   | 438.32 Late effects of cerebrovascular disease; monoplegia of upper limb affecting nondominant side                                                                                                                                                                                                                |
| <b>Stroke-related spasticity – lower limb</b>                                                     | <b>ICD-10-CM Codes (2015-present) used alone:</b>                                                                                                                                                                                                                                                                  |
|                                                                                                   | I69.041 – I69.044, I69.049 Monoplegia of lower limb following nontraumatic subarachnoid hemorrhage                                                                                                                                                                                                                 |
|                                                                                                   | I69.051 – I69.054, I69.059 Hemiplegia and hemiparesis following nontraumatic subarachnoid hemorrhage                                                                                                                                                                                                               |
|                                                                                                   | I69.061 – I69.065, I69.069 Other paralytic syndrome following nontraumatic subarachnoid hemorrhage                                                                                                                                                                                                                 |
|                                                                                                   | I69.141 – I69.144, I69.149 Monoplegia of lower limb following nontraumatic intracerebral hemorrhage                                                                                                                                                                                                                |
|                                                                                                   | I69.151 – I69.154, I69.159 Hemiplegia and hemiparesis following nontraumatic intracerebral hemorrhage                                                                                                                                                                                                              |
|                                                                                                   | I69.161 – I69.165, I69.169 Other paralytic syndrome following nontraumatic intracerebral hemorrhage                                                                                                                                                                                                                |
|                                                                                                   | I69.241 – I69.244, I69.249 Monoplegia of lower limb following other nontraumatic intracranial hemorrhage                                                                                                                                                                                                           |
|                                                                                                   | I69.251 – I69.254, I69.259 Hemiplegia and hemiparesis following other nontraumatic intracranial hemorrhage                                                                                                                                                                                                         |
|                                                                                                   | I69.261 – I69.265, I69.269 Other paralytic syndrome following other nontraumatic intracranial hemorrhage                                                                                                                                                                                                           |
|                                                                                                   | I69.341 – I69.344, I69.349 Monoplegia of lower limb following cerebral infarction                                                                                                                                                                                                                                  |
|                                                                                                   | I69.351 – I69.354, I69.359 Hemiplegia and hemiparesis following cerebral infarction                                                                                                                                                                                                                                |
|                                                                                                   | I69.361 – I69.365, I69.369 Other paralytic syndrome following cerebral infarction                                                                                                                                                                                                                                  |
|                                                                                                   | I69.841 – I69.844, I69.849 Monoplegia of lower limb following other cerebrovascular disease                                                                                                                                                                                                                        |
|                                                                                                   | I69.851 – I69.854, I69.859 Hemiplegia and hemiparesis following other cerebrovascular disease                                                                                                                                                                                                                      |
|                                                                                                   | I69.861 – I69.865, I69.869 Other paralytic syndrome following other cerebrovascular disease                                                                                                                                                                                                                        |
|                                                                                                   | I69.941 – I69.944, I69.949 Monoplegia of lower limb following unspecified cerebrovascular disease                                                                                                                                                                                                                  |
|                                                                                                   | I69.951 – I69.954, I69.959 Hemiplegia and hemiparesis following unspecified cerebrovascular disease                                                                                                                                                                                                                |
| I69.961 – I69.965, I69.969 Other paralytic syndrome following unspecified cerebrovascular disease |                                                                                                                                                                                                                                                                                                                    |
| <b>Stroke-related spasticity – upper limb requiring a diagnosis of stroke</b>                     | <b>ICD-10-CM Codes (2015-present) that require a diagnosis of stroke:</b>                                                                                                                                                                                                                                          |
|                                                                                                   | *It is assumed that the qualifying stroke documented within 12 months prior to stroke-related spasticity claim satisfies these criteria. Patients for whom there is no qualifying stroke diagnosis prior to, or concurrent with, one of the following spasticity diagnosis claims will be excluded from the study. |
|                                                                                                   | G81.10 – G81.14 Spastic hemiplegia                                                                                                                                                                                                                                                                                 |
|                                                                                                   | G82.50 – G82.54 Quadriplegia                                                                                                                                                                                                                                                                                       |
|                                                                                                   | G83.0 Diplegia of upper limbs                                                                                                                                                                                                                                                                                      |
|                                                                                                   | G83.20 – G83.24 Monoplegia of upper limb                                                                                                                                                                                                                                                                           |
|                                                                                                   | G83.30 – G83.34 Monoplegia, unspecified                                                                                                                                                                                                                                                                            |
|                                                                                                   | G83.89 Other specified paralytic syndromes                                                                                                                                                                                                                                                                         |
|                                                                                                   | G83.9 Paralytic syndrome, unspecified                                                                                                                                                                                                                                                                              |
| S06.9X0S – S06.9X5S, S06.9X9S Unspecified intracranial injury, sequela                            |                                                                                                                                                                                                                                                                                                                    |
|                                                                                                   | <b>ICD-10-CM Codes (2015-present) that require a diagnosis of stroke:</b>                                                                                                                                                                                                                                          |

|                                                                                                   |                                                                                                                                                                                                                                                                                                                                                                                                                                                                                                                                                                                                                                                                                                                                                                                                                                                                                                                                                                                                                                                                                                                                                                                                                                                                                                                                                                                                                                                                                                                                                                       |
|---------------------------------------------------------------------------------------------------|-----------------------------------------------------------------------------------------------------------------------------------------------------------------------------------------------------------------------------------------------------------------------------------------------------------------------------------------------------------------------------------------------------------------------------------------------------------------------------------------------------------------------------------------------------------------------------------------------------------------------------------------------------------------------------------------------------------------------------------------------------------------------------------------------------------------------------------------------------------------------------------------------------------------------------------------------------------------------------------------------------------------------------------------------------------------------------------------------------------------------------------------------------------------------------------------------------------------------------------------------------------------------------------------------------------------------------------------------------------------------------------------------------------------------------------------------------------------------------------------------------------------------------------------------------------------------|
| <b>Stroke-related spasticity – lower limb requiring a diagnosis of stroke</b>                     | <p>*It is assumed that the qualifying stroke documented within 12 months prior to stroke-related spasticity claim satisfies these criteria. Patients for whom there is no qualifying stroke diagnosis prior to, or concurrent with, one of the following spasticity diagnosis claims will be excluded from the study.</p> <p>G81.10 – G81.14 Spastic hemiplegia</p> <p>G82.20 Paraplegia, unspecified</p> <p>G82.21 Paraplegia, complete</p> <p>G82.22 Paraplegia, incomplete</p> <p>G82.50 Quadriplegia, unspecified</p> <p>G82.51 Quadriplegia, C1-C4 complete</p> <p>G82.52 Quadriplegia, C1-C4 incomplete</p> <p>G82.53 Quadriplegia, C5-C7 complete</p> <p>G82.54 Quadriplegia, C5-C7 incomplete</p> <p>G83.10 – G83.14 Monoplegia of lower limb</p> <p>G83.30 – G83.34 Monoplegia, unspecified</p> <p>G83.89 Other specified paralytic syndromes</p> <p>G83.9 Paralytic syndrome, unspecified</p> <p>S06.9X0S – S06.9X5S, S06.9X9S Unspecified intracranial injury, sequela</p>                                                                                                                                                                                                                                                                                                                                                                                                                                                                                                                                                                                 |
| <b>Stroke-related spasticity – upper limb requiring a secondary diagnosis from specified list</b> | <p><b>ICD-9-CM Codes (2010-2014) requiring secondary diagnosis from List A:</b></p> <p>438.50 Late effects of cerebrovascular disease; other paralytic syndrome affecting unspecified side</p> <p>438.51 Late effects of cerebrovascular disease; other paralytic syndrome affecting dominant side</p> <p>438.52 Late effects of cerebrovascular disease; other paralytic syndrome affecting nondominant side</p> <p>438.53 Late effects of cerebrovascular disease; other paralytic syndrome, bilateral</p> <p><b>Secondary diagnosis codes (List A):</b></p> <p>*Must be documented concurrent with, or within 12 months prior to, stroke-related spasticity claim identified on one of the above noted ICD-9-CM codes.</p> <p>344.00 Other paralytic syndromes; quadriplegia, unspecified</p> <p>344.01 Other paralytic syndromes; quadriplegia and quadriparesis; C1-C4, complete</p> <p>344.02 Other paralytic syndromes; quadriplegia and quadriparesis; C1-C4, incomplete</p> <p>344.03 Other paralytic syndromes; quadriplegia and quadriparesis; C5-C7, complete</p> <p>344.04 Other paralytic syndromes; quadriplegia and quadriparesis; C5-C7, incomplete</p> <p>344.09 Other paralytic syndromes; quadriplegia and quadriparesis; other</p> <p>344.2 Other paralytic syndromes; diplegia of upper limbs</p> <p>344.5 Other paralytic syndromes; unspecified monoplegia</p> <p>344.89 Other paralytic syndromes; other specified paralytic syndromes; other specified paralytic syndrome</p> <p>344.9 Other paralytic syndromes; paralysis unspecified</p> |
| <b>Diagnosis of stroke</b>                                                                        | <p><b>ICD-10-CM Codes (2015-present):</b></p> <p>I60 (all) Nontraumatic subarachnoid hemorrhage</p> <p>I61 Nontraumatic intracerebral hemorrhage</p> <p>I62 Other and unspecified nontraumatic intracranial hemorrhage</p> <p>I63 Cerebral infarction</p> <p>I67.2 Cerebral atherosclerosis</p> <p>I67.81 Acute cerebrovascular insufficiency</p> <p>I67.82 Cerebral ischemia</p> <p><b>ICD-9-CM Codes (2010-2014):</b></p>                                                                                                                                                                                                                                                                                                                                                                                                                                                                                                                                                                                                                                                                                                                                                                                                                                                                                                                                                                                                                                                                                                                                           |

|  |                                                                                      |
|--|--------------------------------------------------------------------------------------|
|  | 432.9 Intracranial hemorrhage not otherwise specified (NOS)                          |
|  | 434.01 Cerebral thrombosis with cerebral infarction                                  |
|  | 434.11 Cerebral embolism with cerebral infarction                                    |
|  | 434.90 Cerebral artery occlusion, unspecified without mention of cerebral infarction |
|  | 435.0 Basilar artery syndrome                                                        |
|  | 435.1 Vertebral artery syndrome                                                      |
|  | 435.2 Subclavian steal syndrome                                                      |
|  | 435.3 Vertebrobasilar artery syndrome                                                |
|  | 435.8 Other specified transient cerebral ischemia                                    |
|  | 435.8 Unspecified transient cerebral ischemia                                        |
|  | 435.91 Cerebral artery occlusion, unspecified with cerebral infarction               |
|  | 436 Acute, but ill-defined, cerebrovascular disease                                  |
|  | 437.0 Cerebral atherosclerosis                                                       |
|  | 437.1 Other generalized ischemic cerebrovascular disease                             |
|  | 437.2 Hypertensive encephalopathy                                                    |
|  | 437.3 Cerebral aneurysm, nonruptured                                                 |
|  | 437.4 Cerebral arteritis                                                             |
|  | 437.8 Other ill-defined cerebrovascular disease                                      |
|  | 437.9 Unspecified cerebrovascular disease                                            |

**Table SII. Service Codes for Other Outpatient Claims**

| Project              | Coding                                                                                                                                                                                                                                                                                                                                                                                                                                                                                                                                                                                                                                             |
|----------------------|----------------------------------------------------------------------------------------------------------------------------------------------------------------------------------------------------------------------------------------------------------------------------------------------------------------------------------------------------------------------------------------------------------------------------------------------------------------------------------------------------------------------------------------------------------------------------------------------------------------------------------------------------|
| Occupational therapy | CPT: 97165, 97166, 19767, 97168 with a diagnosis of spasticity<br>HCPCS: S9129, G0129, G0152, G0158, G0160<br>PT and OT visit claims were required to include primary or secondary ICD-9-CM diagnosis codes for the patients' conditions                                                                                                                                                                                                                                                                                                                                                                                                           |
| Physical therapy     | CPT: 97161, 97162, 97163, 97164 with a diagnosis of spasticity<br>HCPCS: G0151, G0157, G0159, S8990, S9131<br>PT and OT visit claims were required to include primary or secondary ICD-9-CM diagnosis codes for the patients' conditions<br><b>Other codes that cover both PT and OT:</b><br>Supervised (untimed) modalities (97010–97028)<br>Constant attendance (one-on-one) modalities (97032–97039, which are billable in 15-minute increments)<br>Therapeutic (one-on-one) procedures (97110–97546)<br>Active wound care management (97597–97606)<br>Tests and measurements (97750–97755)<br>Orthotic and prosthetic management (97760–97762) |

CPT, Current Procedural Technology; HCPCS, Healthcare Common Procedure Coding System; OT, occupational therapy; PT, physical therapy

**Table SIII. Cohort attrition**

| <b>Step</b> | <b>Criteria</b>                                                                                                                                                        | <b>Patients, n</b> | <b>% Excluded in Step</b> |
|-------------|------------------------------------------------------------------------------------------------------------------------------------------------------------------------|--------------------|---------------------------|
| 1           | Include patients diagnosed with stroke-related spasticity at any time during the study period. Earliest qualifying diagnosis date is defined as spasticity onset date. | 352,064            | –                         |
| 2           | Exclude patients with a spasticity onset date before 1/1/2010                                                                                                          | 294,054            | 16                        |
| 3           | Exclude patients with a spasticity diagnosis unrelated to stroke                                                                                                       | 269,685            | 8                         |
| 4           | Continuous enrolment $\geq 1$ year before and after initial spasticity diagnosis                                                                                       | 85,051             | 68                        |
| 5           | Exclude patients treated with toxins other than onabotulinumtoxinA                                                                                                     | 83,574             | 2                         |
| 6           | Exclude those with prior treatment with onabotulinumtoxinA within 1 year of initial spasticity diagnosis                                                               | 83,009             | 1                         |
| 7           | OnabotulinumtoxinA administration between 1/1/2010 and 06/30/2018 (initial administration as index date)                                                               | 2,696              | 97                        |
| 8           | Spasticity diagnosis $\leq 30$ days before or after index date and no onabotulinumtoxinA claims for other indications on index date                                    | 1,876              | 30                        |
| 9           | Continuous enrolment $\geq 1$ year before and after index date                                                                                                         | 1,425              | 24                        |
| 10          | Aged $\geq 18$ years at index date                                                                                                                                     | 1,336              | 6                         |
| 11          | Exclude those with evidence of contracture $\leq 1$ year pre-index                                                                                                     | 1,116              | 16                        |
| 12          | OnabotulinumtoxinA cohort                                                                                                                                              | 735                | 34                        |
